# Supplementary material for: The changing spectrum of microbial aetiology of respiratory tract infections in hospitalized patients before and during the COVID-19 pandemic
Source: Springer Nature journal article supplement (doi:10.1186/s12879-022-07732-5), 2022-09-30
Supplement: MOESM1 [file 23558608]

## Additional file 1

| <b>BioFire® FilmArray® Pneumonia panel <i>plus</i> (FAP <i>plus</i>) targets</b>                                                                                                                                                                                                                                                                                                                                                                                                                               |
|----------------------------------------------------------------------------------------------------------------------------------------------------------------------------------------------------------------------------------------------------------------------------------------------------------------------------------------------------------------------------------------------------------------------------------------------------------------------------------------------------------------|
| <b><u>Bacteria (semi-quantitative)</u></b>                                                                                                                                                                                                                                                                                                                                                                                                                                                                     |
| <i>Acinetobacter calcoaceticus-baumannii</i> complex<br><i>Enterobacter cloacae</i><br><i>Escherichia coli</i><br><i>Haemophilus influenzae</i><br><i>Klebsiella aerogenes</i><br><i>Klebsiella oxytoca</i><br><i>Klebsiella pneumoniae</i> group<br><i>Moraxella catarrhalis</i><br><i>Proteus</i> spp.<br><i>Pseudomonas aeruginosa</i><br><i>Serratia marcescens</i><br><i>Staphylococcus aureus</i><br><i>Streptococcus agalactiae</i><br><i>Streptococcus pneumoniae</i><br><i>Streptococcus pyogenes</i> |
| <b><u>Atypical bacteria (qualitative)</u></b>                                                                                                                                                                                                                                                                                                                                                                                                                                                                  |
| <i>Legionella pneumophila</i><br><i>Mycoplasma pneumoniae</i><br><i>Chlamydia pneumoniae</i>                                                                                                                                                                                                                                                                                                                                                                                                                   |
| <b><u>Viruses (qualitative)</u></b>                                                                                                                                                                                                                                                                                                                                                                                                                                                                            |
| Influenza A virus<br>Influenza B virus<br>Adenovirus<br>Coronavirus (229E, OC43, HKU1, NL63)<br>Parainfluenza virus 1-4<br>Respiratory syncytial virus<br>Human rhinovirus/enterovirus<br>Human metapneumovirus<br>Middle East respiratory syndrome coronavirus                                                                                                                                                                                                                                                |
| <b><u>Antibiotic resistance genes</u></b>                                                                                                                                                                                                                                                                                                                                                                                                                                                                      |
| <b>ESBL:</b><br>- CTX-M                                                                                                                                                                                                                                                                                                                                                                                                                                                                                        |
| <b>Carbapenemases:</b><br>- KPC<br>- NDM<br>- OXA-48-like<br>- VIM<br>- IMP                                                                                                                                                                                                                                                                                                                                                                                                                                    |
| <b>Methicilin Resistance:</b><br>- mecA/mecC and MREJ                                                                                                                                                                                                                                                                                                                                                                                                                                                          |
